# Supplementary material for: Genome-Wide Identification and Expression Profile Analysis of WRKY Family Genes in Teak (Tectona Grandis)
Source: Research Square preprint supplement (doi:10.21203/rs.3.rs-108100/v1), 2020-11-19
Supplement: Supplementary file 1 [file 762e2f3914674325d9fcb32f.docx]

**TgWRKY1**

**
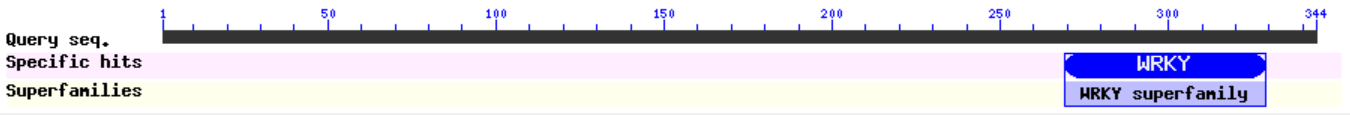
**

**TgWRKY2**

**
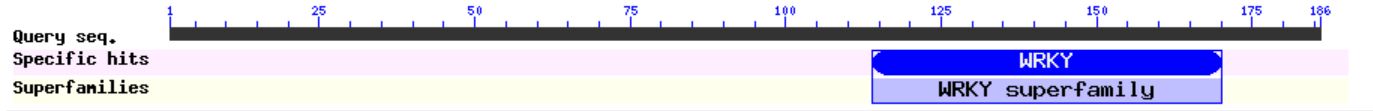
**

**TgWRKY3**

**
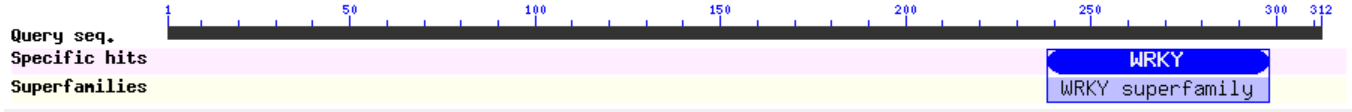
**

**TgWRKY4**

**
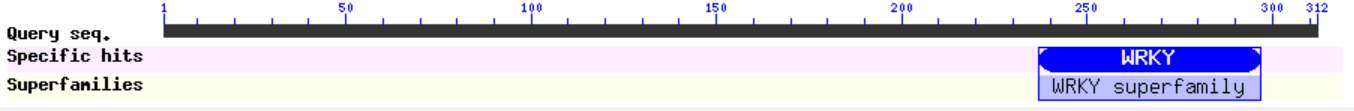
**

**TgWRKY5**

**
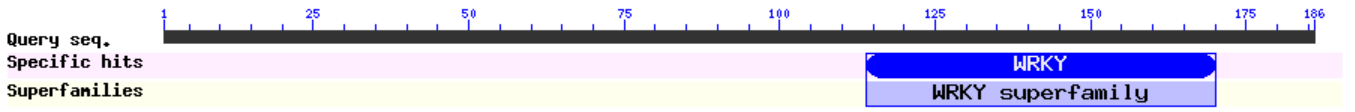
**

**TgWRKY6**

**
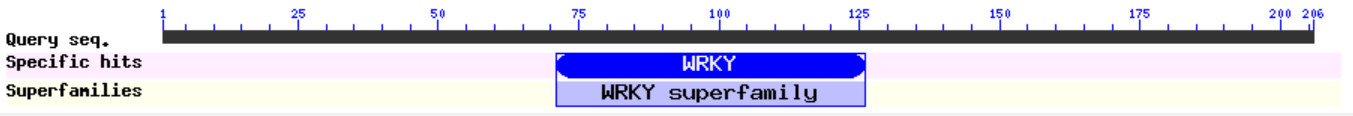
**

**TgWRKY7**

**
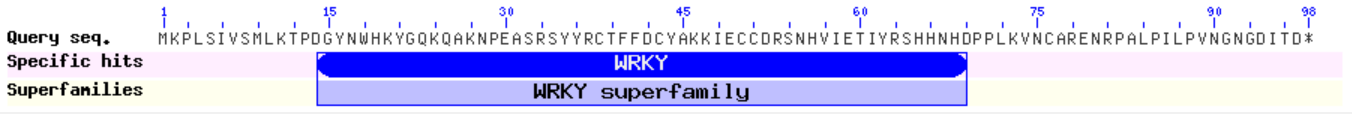
**

**TgWRKY8**

**
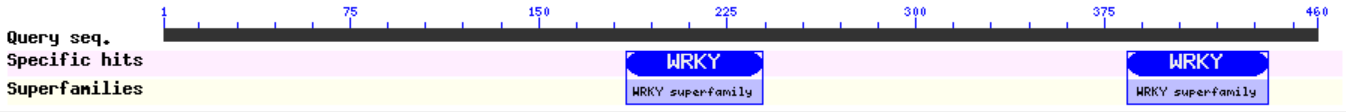
**

**TgWRKY9**

**
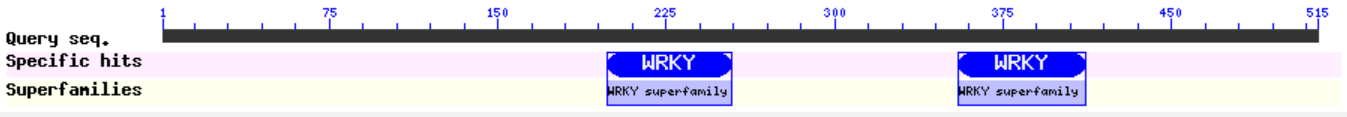
**

**TgWRKY10**

**
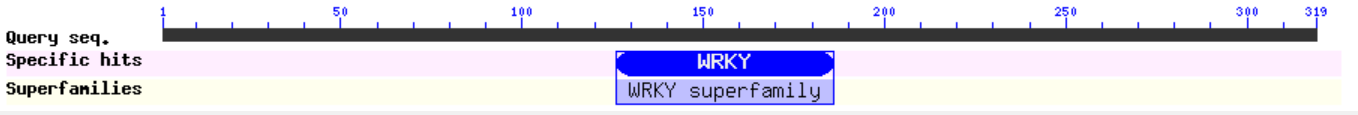
**

**TgWRKY11**

**
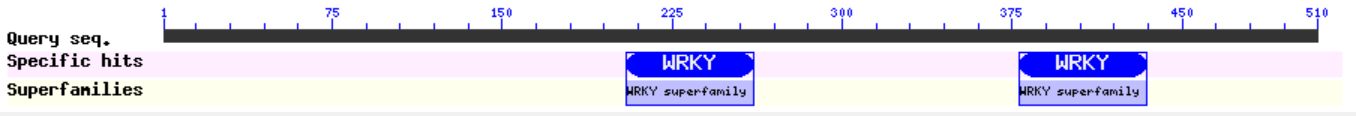
**

**TgWRKY12**

**
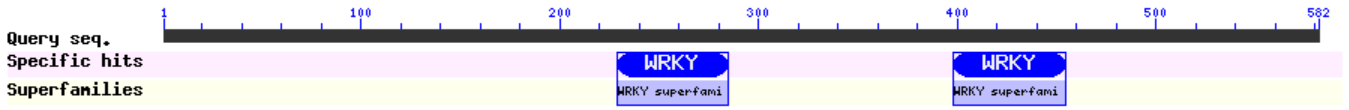
**

**TgWRKY13**

**
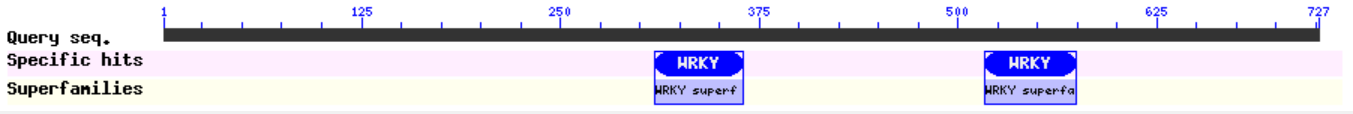
**

**TgWRKY14**

**
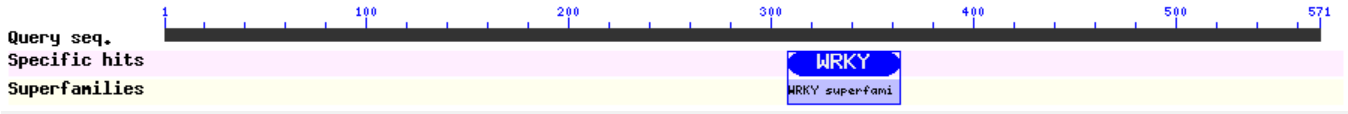
**

**TgWRKY15**

**
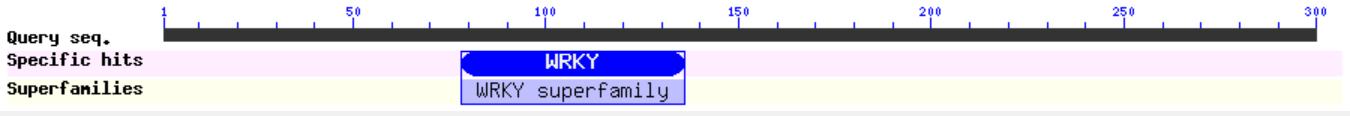
**

**TgWRKY16**

**
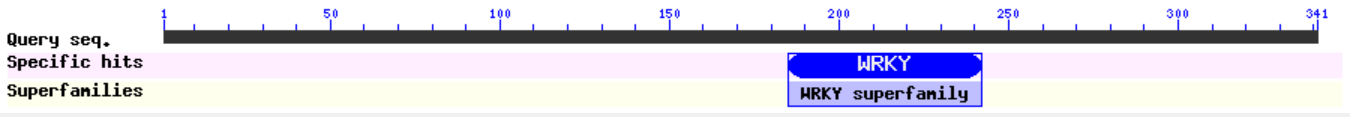
**

**TgWRKY17**

**
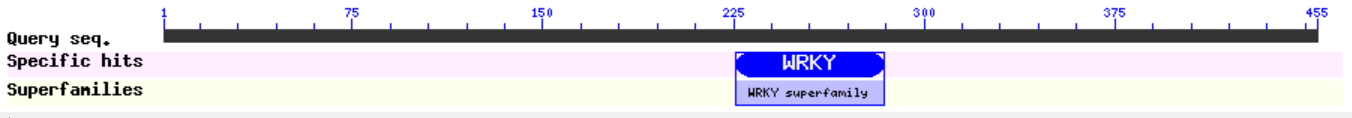
**

**TgWRKY18**

**
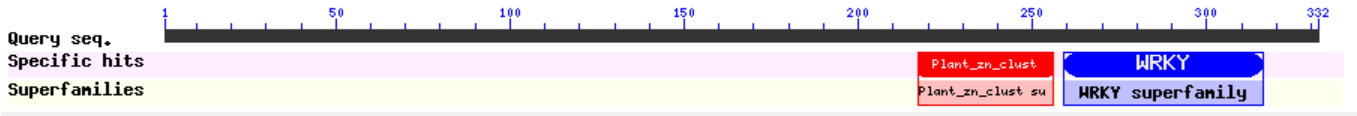
**

**TgWRKY19**

**
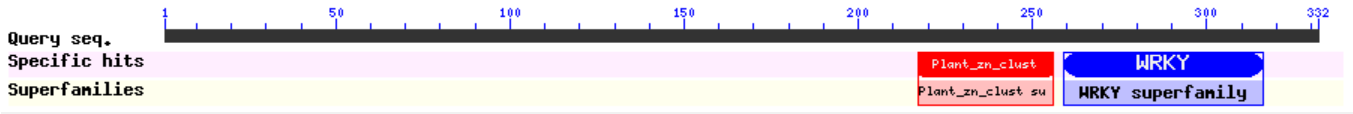
**

**TgWRKY20**

**
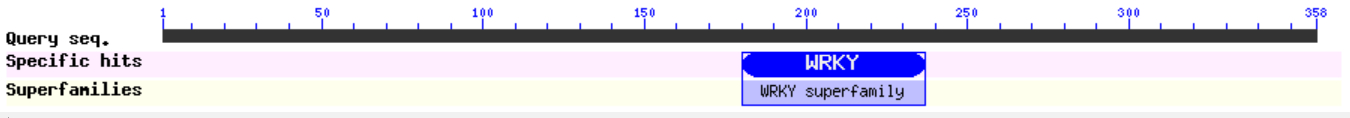
**

**TgWRKY21**

**
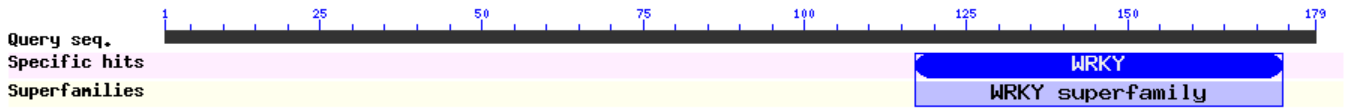
**

**TgWRKY22**

**
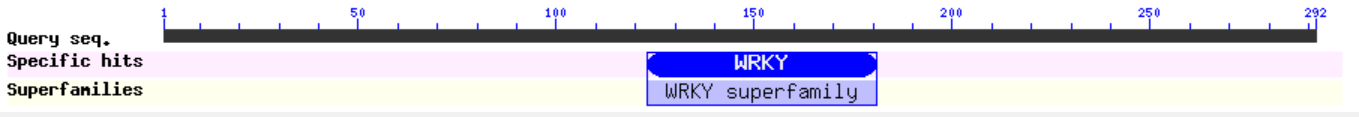
**

**TgWRKY23**

**
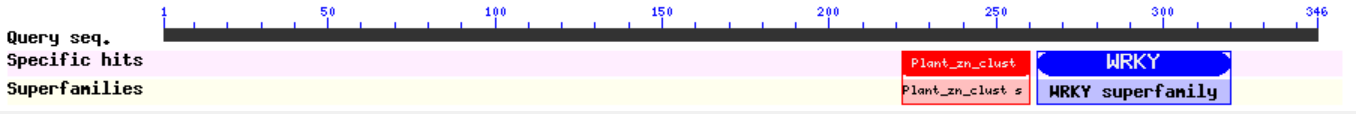
**

**TgWRKY24**

**
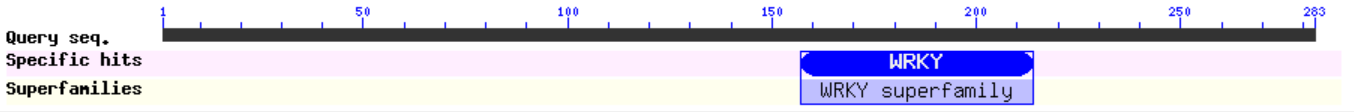
**

**TgWRKY25**

**
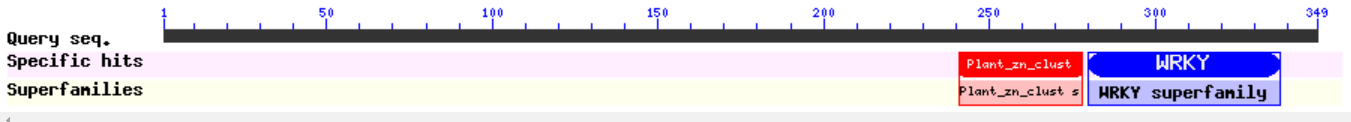
**

**TgWRKY26**

**
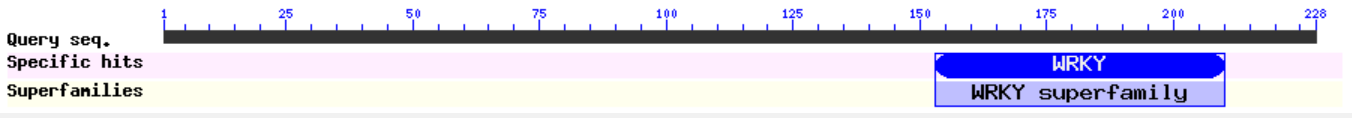
**

**TgWRKY27**

**
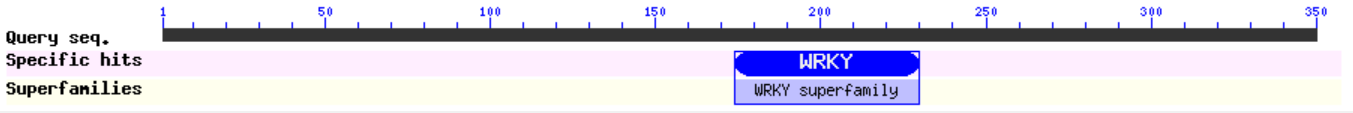
**

**TgWRKY28**

**
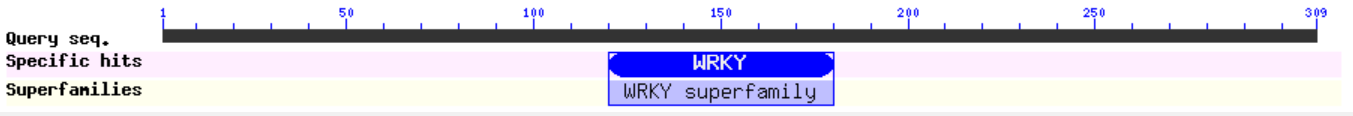
**

**TgWRKY29**

**
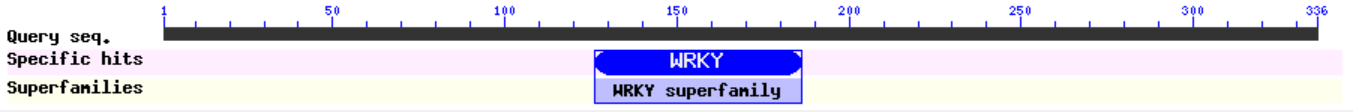
**

**TgWRKY30**

**
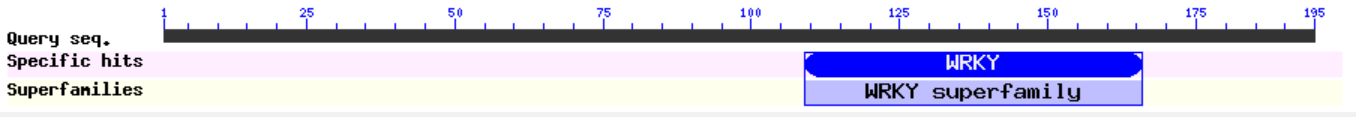
**

**TgWRKY31**

**
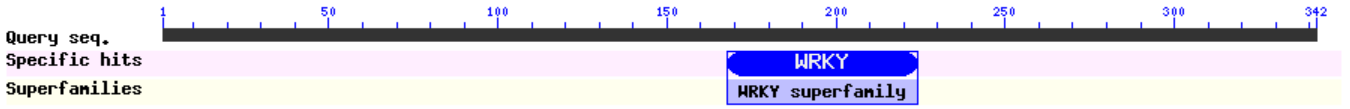
**

**TgWRKY32**

**
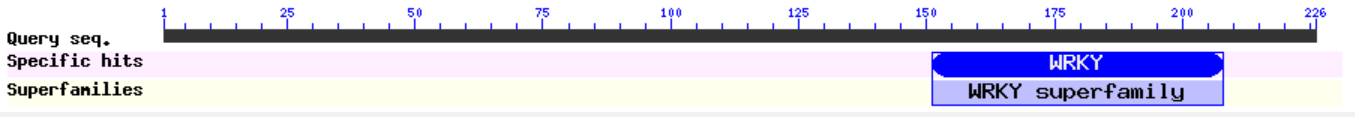
**

**TgWRKY33**

**
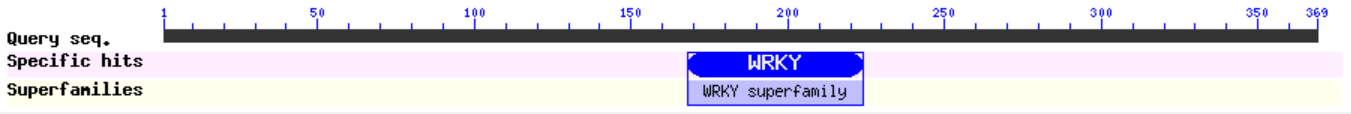
**

**TgWRKY34**

**
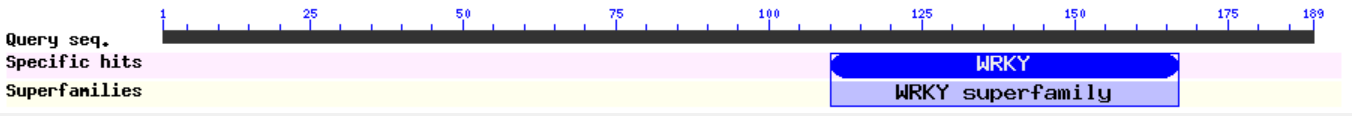
**

**TgWRKY35**

**
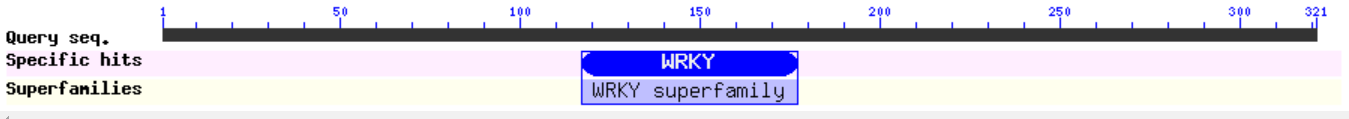
**

**TgWRKY36**

**
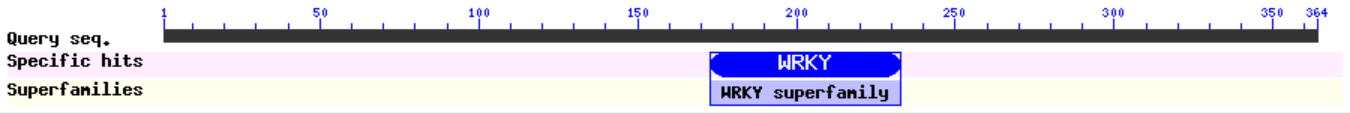
**

**TgWRKY37**

**
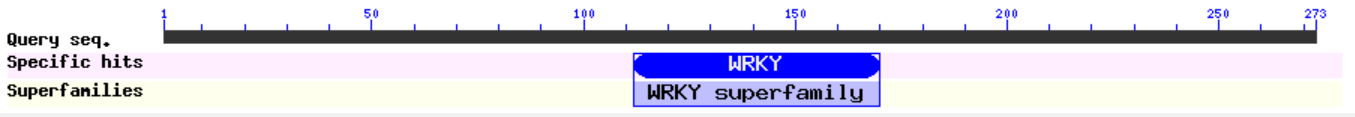
**

**TgWRKY38**

**
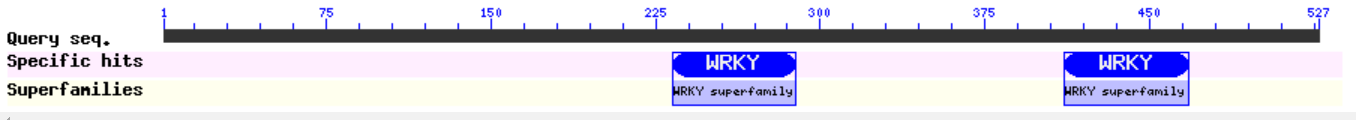
**

**TgWRKY39**

**
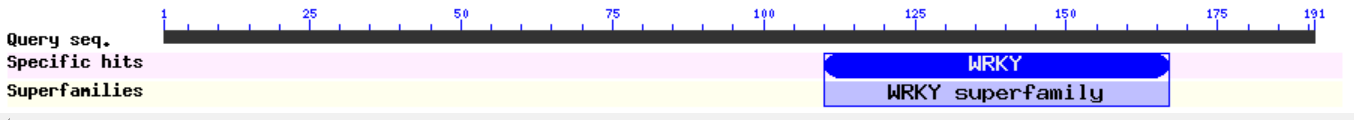
**

**TgWRKY40**

**
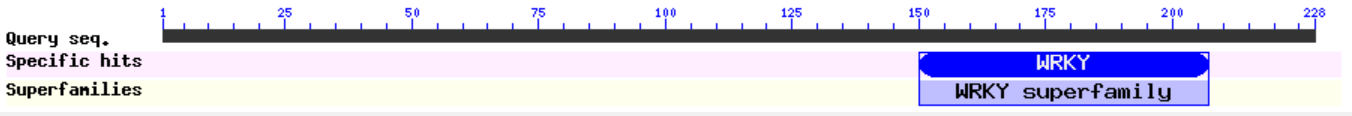
**

**TgWRKY41**

**
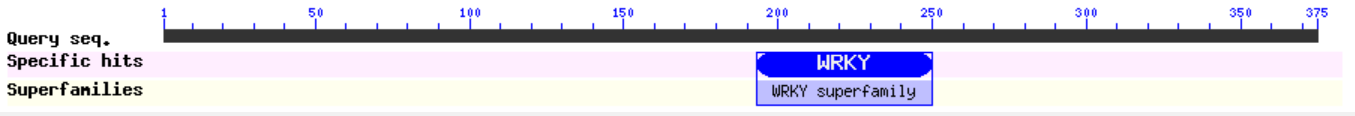
**

**TgWRKY42**

**
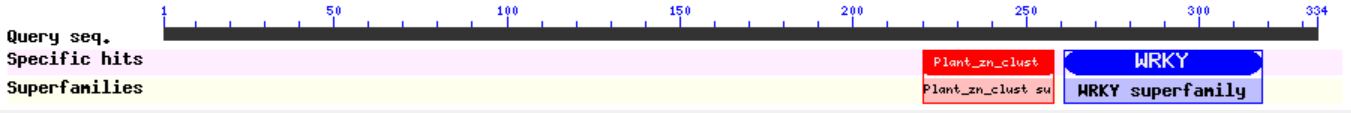
**

**TgWRKY43**

**
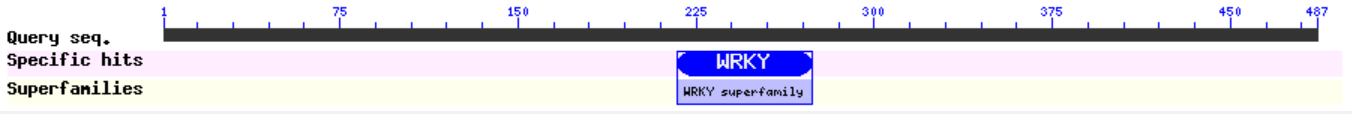
**

**TgWRKY44**

**
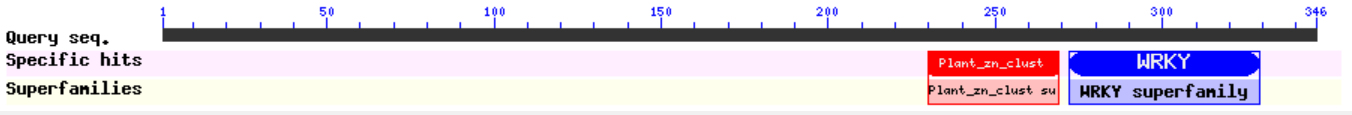
**

**TgWRKY45**

**
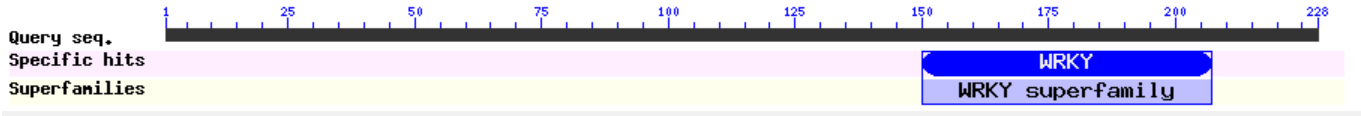
**

**TgWRKY46**

**
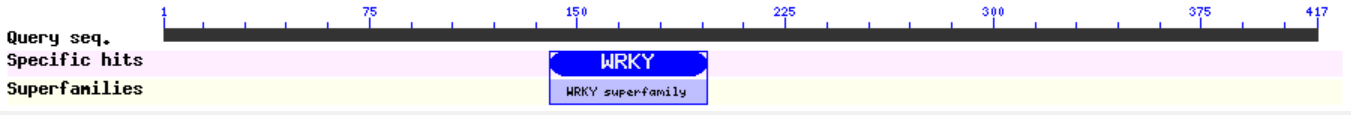
**

**TgWRKY47**

**
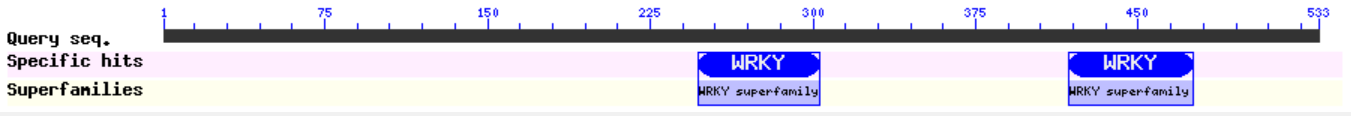
**

**TgWRKY48**

**
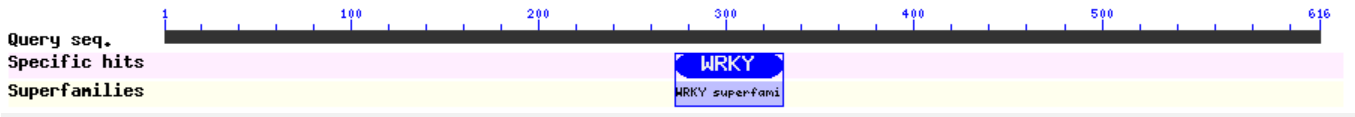
**

**TgWRKY49**

**
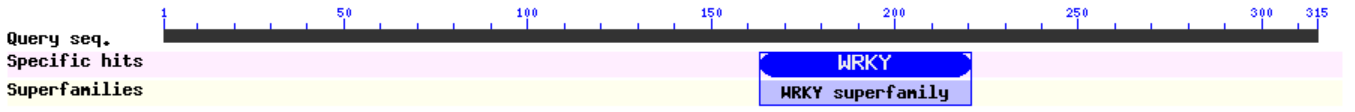
**

**TgWRKY50**

**
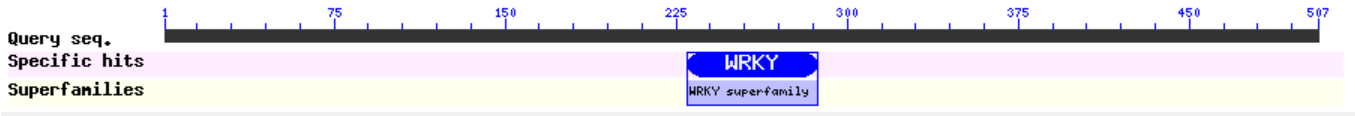
**

**TgWRKY51**

**
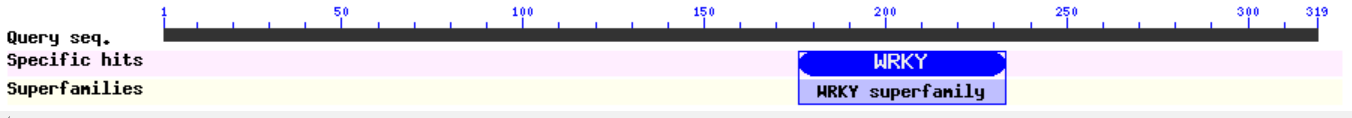
**

**TgWRKY52**

**
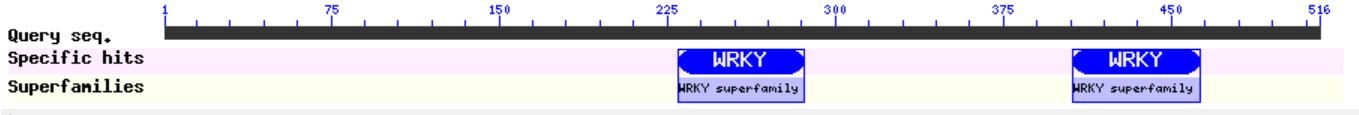
**

**TgWRKY53**

**
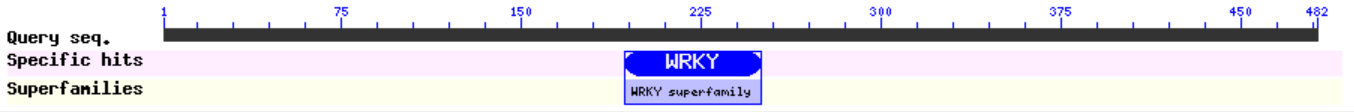
**

**TgWRKY54**

**
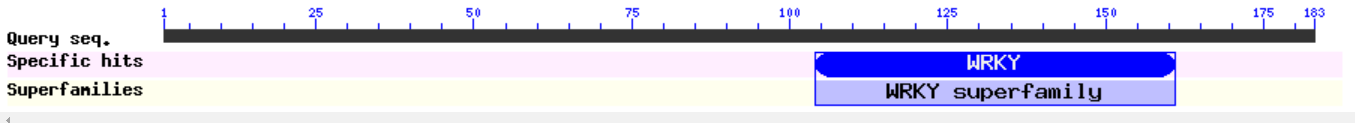
**

**TgWRKY55**

**
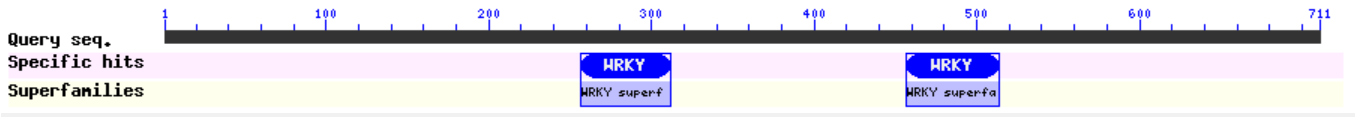
**

**TgWRKY56**

**
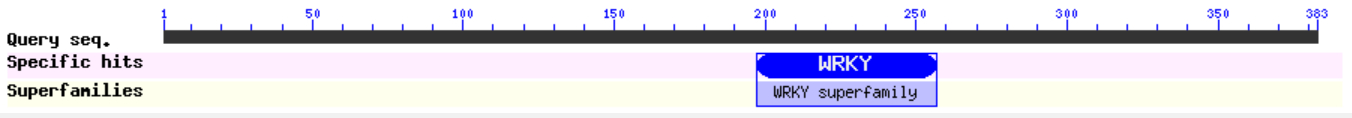
**

**TgWRKY57**

**
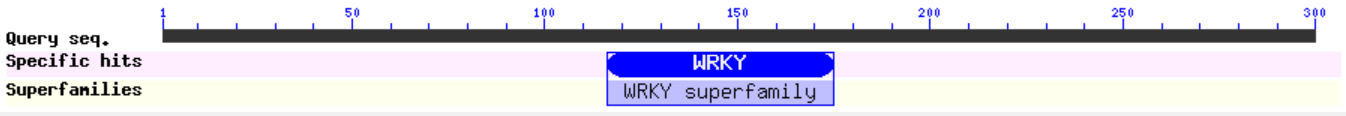
**

**TgWRKY58**

**
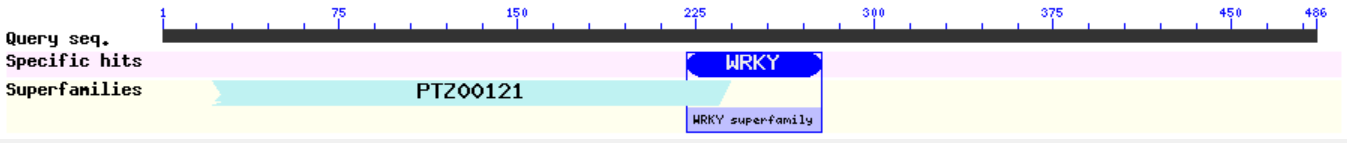
**

**TgWRKY59**

**
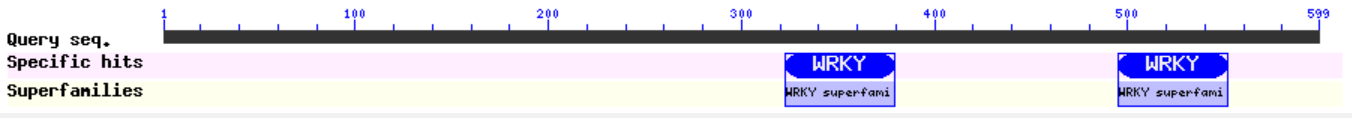
**

**TgWRKY60**

**
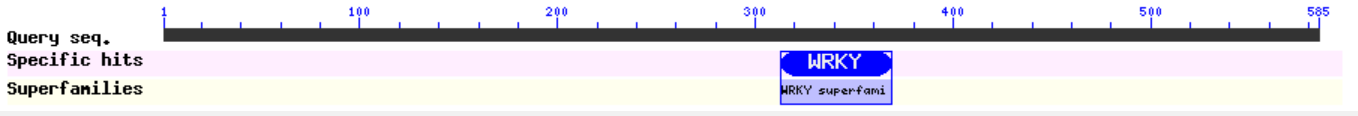
**

**TgWRKY61**

**
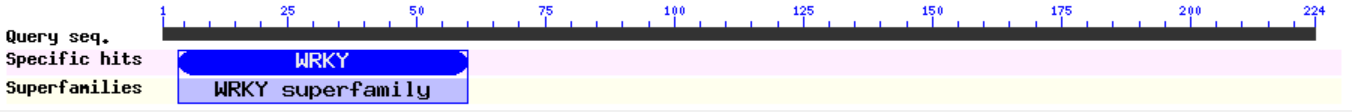
**

**TgWRKY62**

**
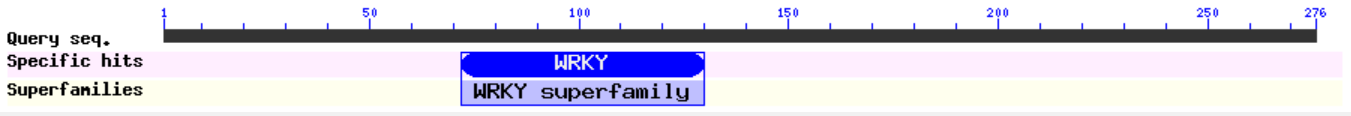
**

**TgWRKY63**

**
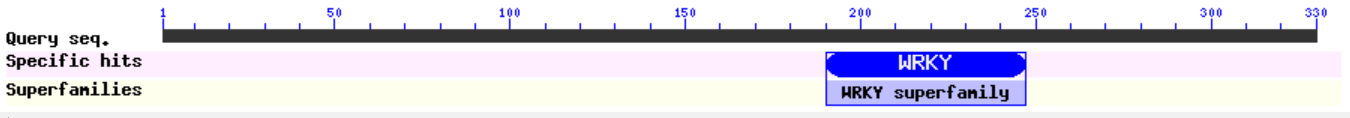
**

**TgWRKY64**

**
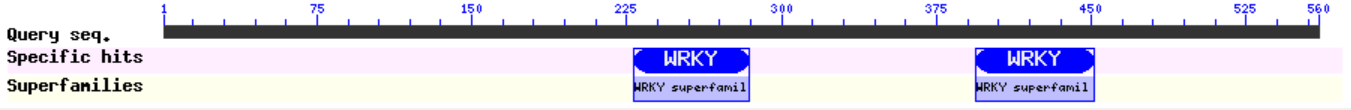
**

**TgWRKY65**

**
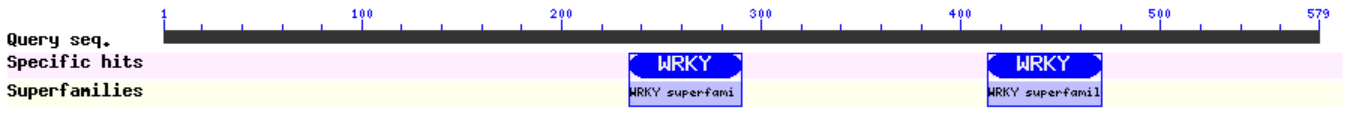
**

**TgWRKY66**

**
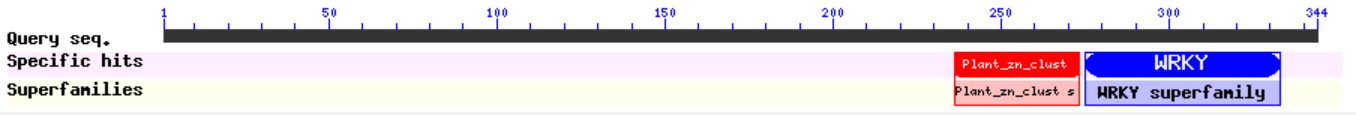
**

**TgWRKY67**

**
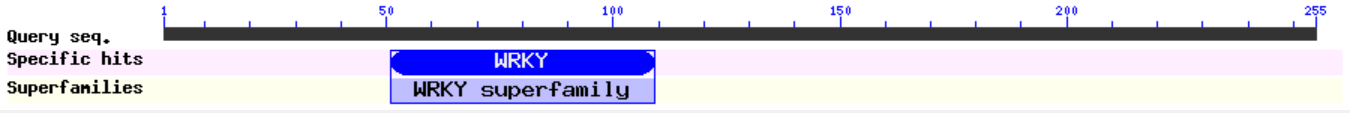
**

**TgWRKY68**

**
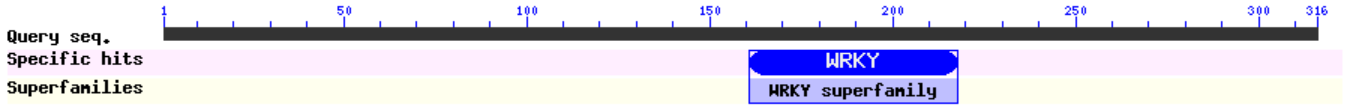
**

**TgWRKY69**

**
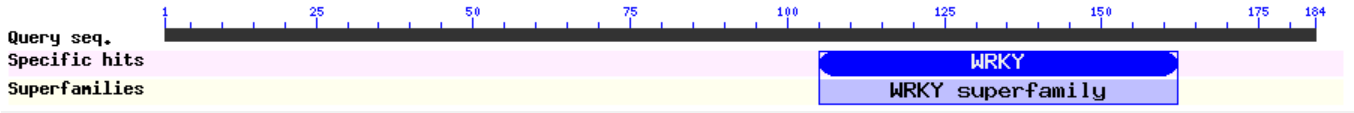
**

**TgWRKY70**

**
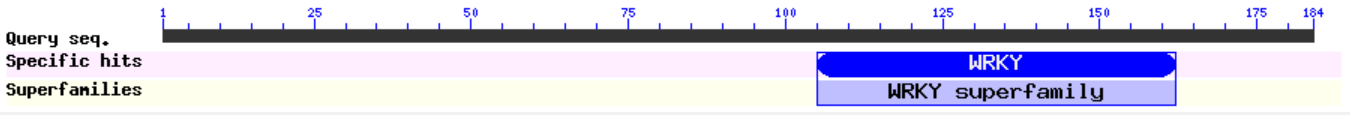
**

**TgWRKY71**

**
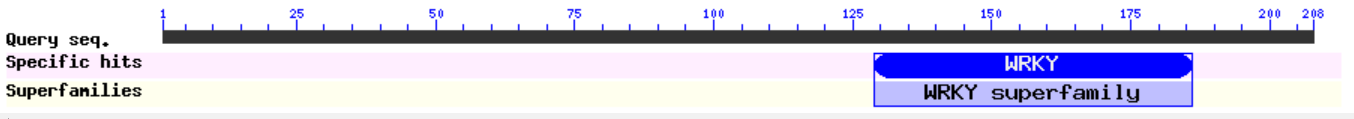
**

**TgWRKY72**

**
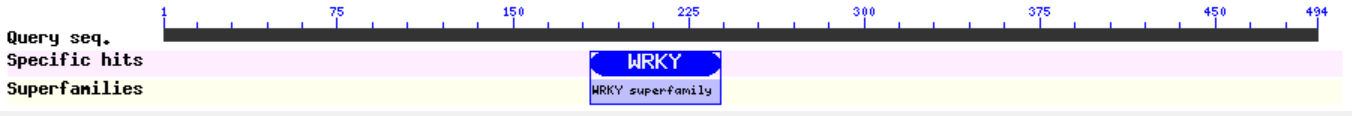
**

**TgWRKY73**

**
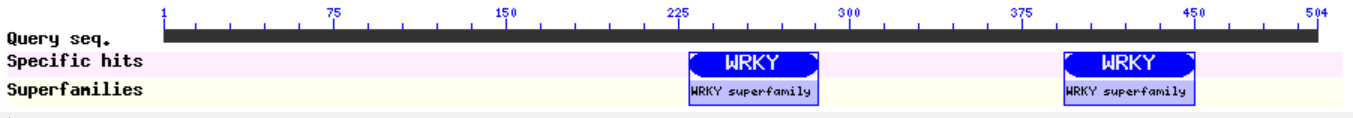
**

**TgWRKY74**

**
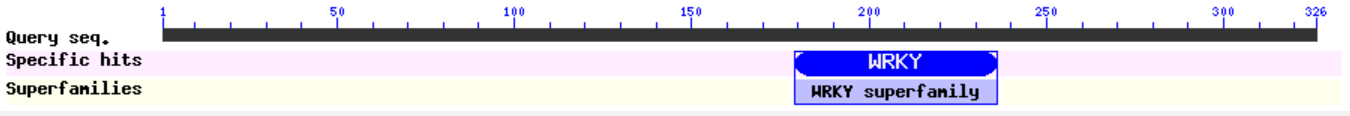
**

**TgWRKY75**

**
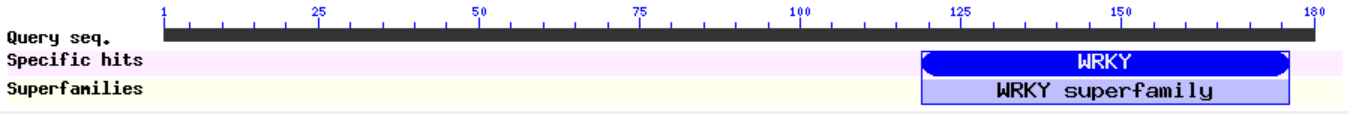
**

**TgWRKY76**

**
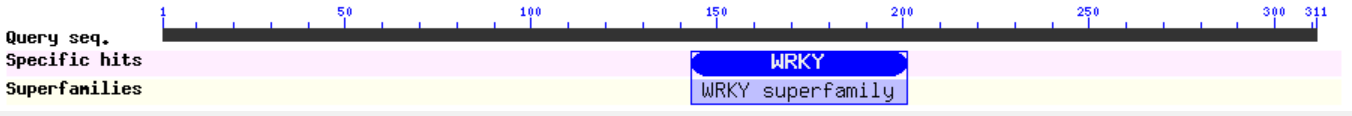
**

**TgWRKY77**

**
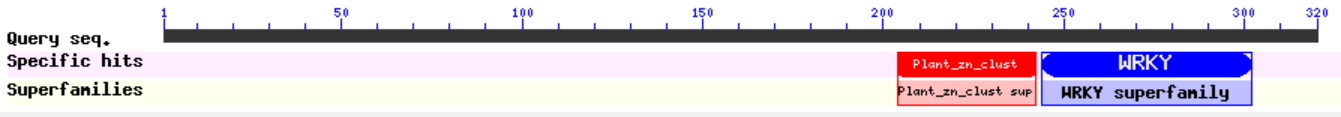
**

**TgWRKY78**

**
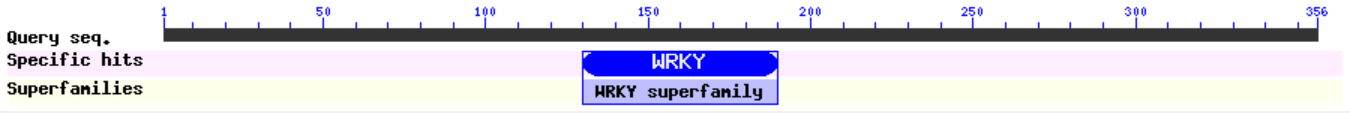
**

**TgWRKY79**

**
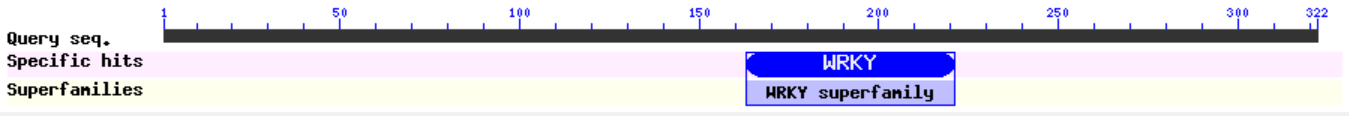
**

**TgWRKY80**

**
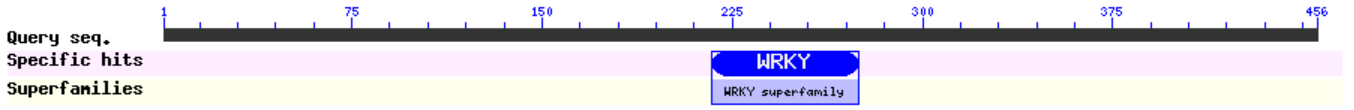
**

**TgWRKY81**

**
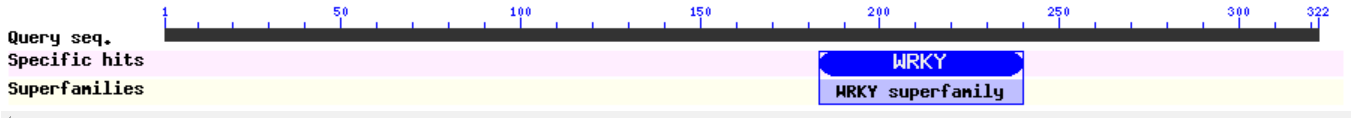
**

**TgWRKY82**

**
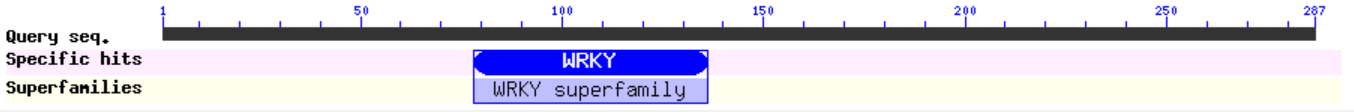
**

**TgWRKY83**

**
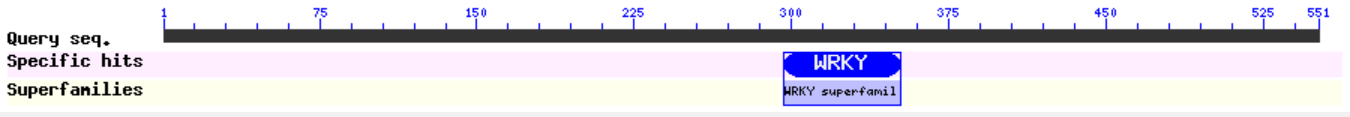
**

**TgWRKY84**

**
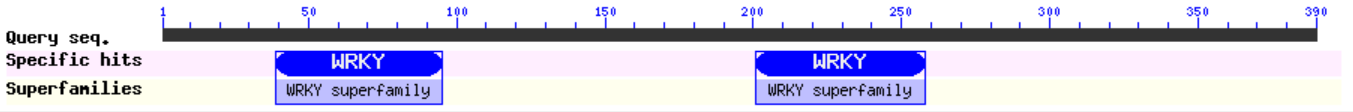
**

**TgWRKY85**

**
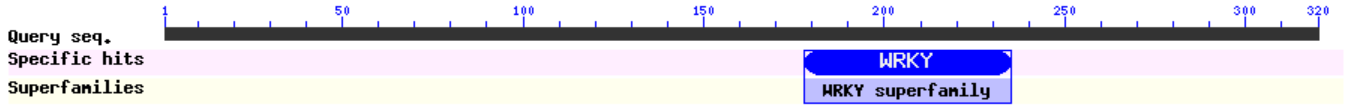
**

**TgWRKY86**

**
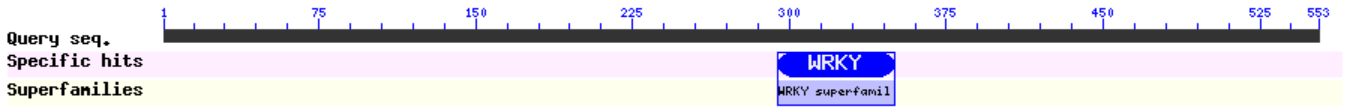
**

**TgWRKY87**

**
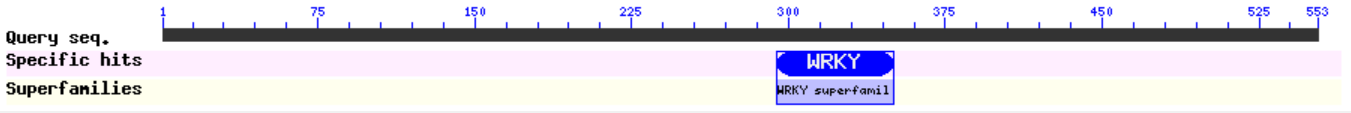
**

**TgWRKY88**

**
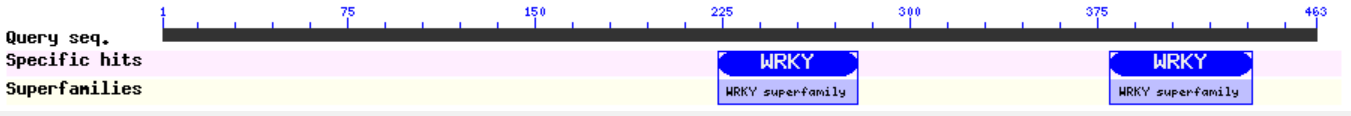
**

**TgWRKY89**

**
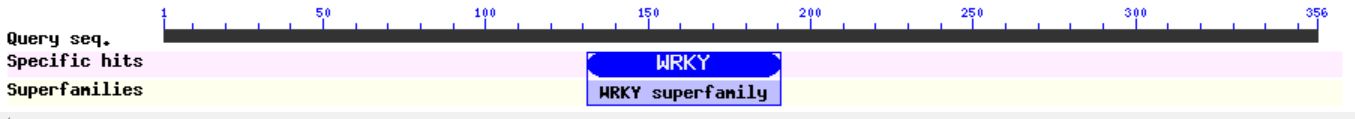
**

**TgWRKY90**

**
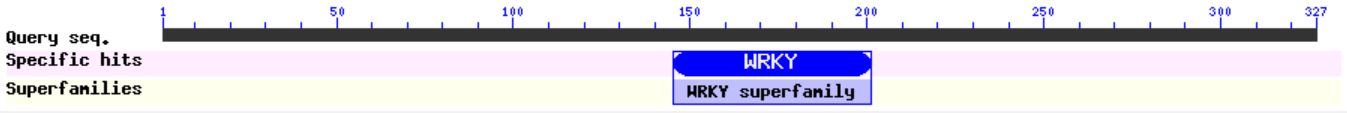
**

**TgWRKY91**

**
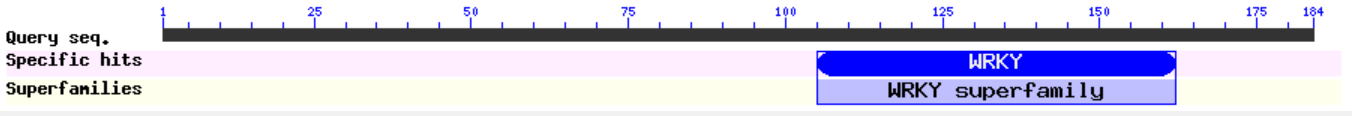
**

**TgWRKY92**

**
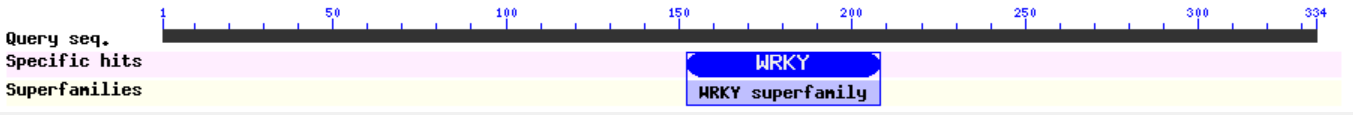
**

**TgWRKY93**

**
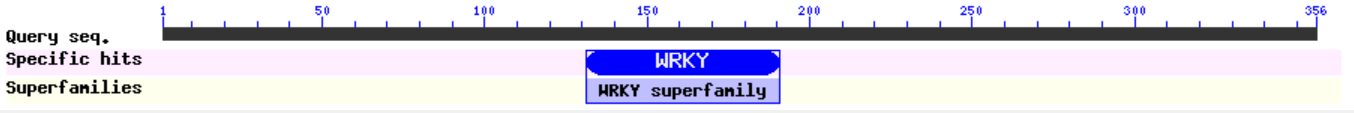
**

**TgWRKY94**

**
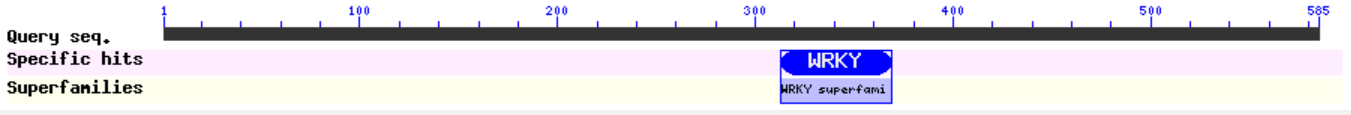
**

**TgWRKY95**

**
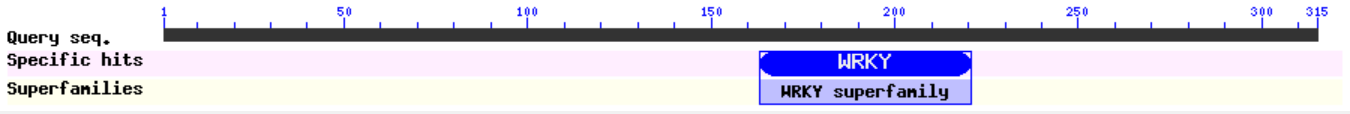
**

**TgWRKY96**

**
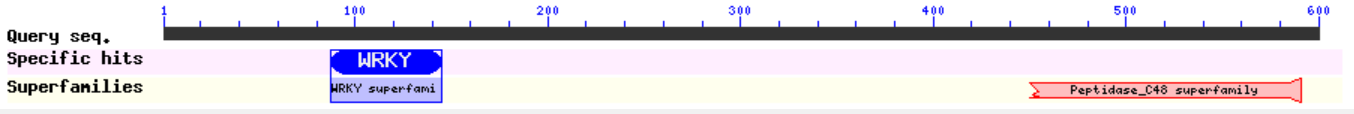
**

**TgWRKY97**

**
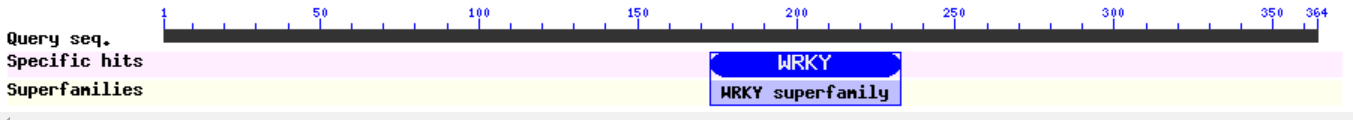
**

**TgWRKY98**

**
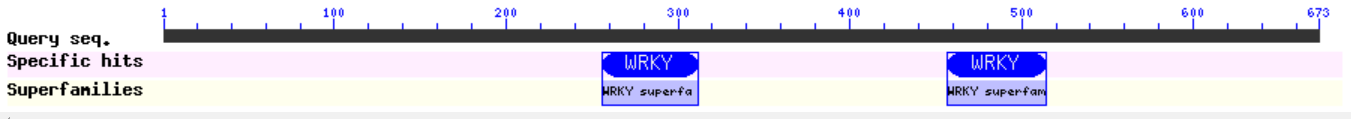
**

**TgWRKY99**

**
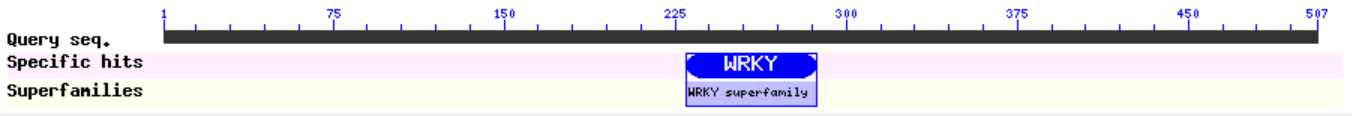
**

**TgWRKY100**

**
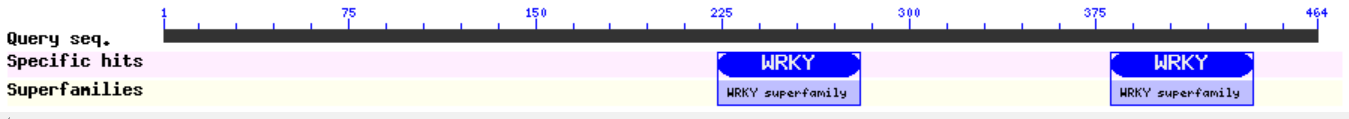
**

**TgWRKY101**

**TgWRKY102**
