# Supplementary material for: Genome-Wide Identification and Expression Profile Analysis of WRKY Family Genes in Teak (Tectona Grandis)
Source: Research Square preprint supplement (doi:10.21203/rs.3.rs-108100/v1), 2020-11-19
Supplement: Supplementary file 2 [file ba66896495d3305995b156f7.xlsx]

## Sheet: Sheet1
Gene Name	Gene ID	Gene Name	Gene ID	Duplication Type	Ka	Ks	Ka_Ks	EffectiveLen	AverageS-sites	AverageN-sites	Divergence time （Mya)
TgWRKY6	Tg01g08210.t1	TgWRKY11	Tg02g02050.t1	Segmental duplication	0.279646	0.920627	0.303756	606	143.333	462.667	30.7
TgWRKY9	Tg01g20850.t1	TgWRKY64	Tg13g11050.t1	Segmental duplication	0.139562	0.788528	0.17699	1500	341.083	1158.92	26.3
TgWRKY9	Tg01g20850.t1	TgWRKY65	Tg14g07210.t1	Segmental duplication	0.368972	-	-	1497	347.5	1149.5	-
TgWRKY9	Tg01g20850.t1	TgWRKY88	Tg18g07110.t1	Segmental duplication	0.408512	-	-	1236	287	949	-
TgWRKY64	Tg13g11050.t1	TgWRKY65	Tg14g07210.t1	Segmental duplication	0.372093	-	-	1605	370.917	1234.08	-
TgWRKY64	Tg13g11050.t1	TgWRKY88	Tg18g07110.t1	Segmental duplication	0.379564	2.47517	0.153349	1302	304.333	997.667	82.5
TgWRKY65	Tg14g07210.t1	TgWRKY88	Tg18g07110.t1	Segmental duplication	0.224546	0.7712	0.291165	1365	320.167	1044.83	25.7
TgWRKY88	Tg18g07110.t1	TgWRKY100	TgUn424g00080.t1	Segmental duplication	0	0	-	1386	325.333	1060.67	-
TgWRKY12	Tg02g08300.t1	TgWRKY59	Tg13g00340.t1	Segmental duplication	0.758591	1.59514	0.475564	1473	338.333	1134.67	53.2
TgWRKY12	Tg02g08300.t1	TgWRKY84	Tg17g06410.t1	Segmental duplication	0.185354	0.808671	0.229208	1149	267.083	881.917	27
TgWRKY15	Tg02g16610.t1	TgWRKY82	Tg17g01810.t1	Segmental duplication	0.179044	0.908783	0.197015	852	188.583	663.417	30.3
TgWRKY15	Tg02g16610.t1	TgWRKY62	Tg13g04030.t1	Segmental duplication	0.562235	-	-	822	189.417	632.583	-
TgWRKY16	Tg02g17470.t1	TgWRKY81	Tg17g01370.t1	Segmental duplication	0.129148	0.778254	0.165946	948	217.5	730.5	25.9
TgWRKY14	Tg02g12350.t1	TgWRKY83	Tg17g04450.t1	Segmental duplication	0.136383	0.691049	0.197357	1638	381.667	1256.33	23
TgWRKY19	Tg03g18080.t1	TgWRKY42	Tg08g09320.t1	Segmental duplication	0.0911229	0.670228	0.135958	975	238.833	736.167	22.3
TgWRKY19	Tg03g18080.t1	TgWRKY44	Tg09g05850.t1	Segmental duplication	0.251429	-	-	963	233.917	729.083	-
TgWRKY42	Tg08g09320.t1	TgWRKY44	Tg09g05850.t1	Segmental duplication	0.282397	1.96258	0.143891	972	235.417	736.583	65.4
TgWRKY20	Tg04g00560.t1	TgWRKY41	Tg08g00560.t1	Segmental duplication	0.180797	0.458503	0.394321	1050	232	818	15.3
TgWRKY20	Tg04g00560.t1	TgWRKY68	Tg14g15480.t1	Segmental duplication	0.506148	1.70946	0.296087	942	207.333	734.667	57
TgWRKY41	Tg08g00560.t1	TgWRKY68	Tg14g15480.t1	Segmental duplication	0.446002	2.92832	0.152306	933	204	729	97.6
TgWRKY27	Tg05g18170.t1	TgWRKY31	Tg06g01580.t1	Segmental duplication	0.195979	0.608884	0.321867	999	227.833	771.167	20.3
TgWRKY27	Tg05g18170.t1	TgWRKY92	Tg18g13670.t1	Segmental duplication	0.579719	2.88392	0.201018	924	202.667	721.333	96.1
TgWRKY31	Tg06g01580.t1	TgWRKY92	Tg18g13670.t1	Segmental duplication	0.592298	3.22724	0.183531	921	205.333	715.667	107.5
TgWRKY33	Tg06g15150.t1	TgWRKY92	Tg18g13670.t1	Segmental duplication	0.665039	3.57987	0.185772	960	213.583	746.417	119.3
TgWRKY31	Tg06g01580.t1	TgWRKY33	Tg06g15150.t1	Segmental duplication	0.585522	-	-	987	225.5	761.5	-
TgWRKY28	Tg05g18660.t1	TgWRKY29	Tg06g00860.t1	Segmental duplication	0.252342	0.791802	0.318693	867	186.417	680.583	26.4
TgWRKY28	Tg05g18660.t1	TgWRKY89	Tg18g12540.t1	Segmental duplication	0.571348	1.67797	0.340499	891	195.167	695.833	56
TgWRKY29	Tg06g00860.t1	TgWRKY35	Tg06g19050.t1	Segmental duplication	0.590682	-	-	930	211.417	718.583	-
TgWRKY29	Tg06g00860.t1	TgWRKY78	Tg16g04320.t1	Segmental duplication	0.516575	3.2981	0.156628	993	221.167	771.833	110
TgWRKY78	Tg16g04320.t1	TgWRKY89	Tg18g12540.t1	Segmental duplication	0.167409	0.813528	0.205781	1050	238	812	27.1
TgWRKY89	Tg18g12540.t1	TgWRKY93	TgUn065g00020.t1	Segmental duplication	0.00609636	0.00832764	0.732063	1065	241.5	823.5	27.8
TgWRKY34	Tg06g16570.t1	TgWRKY54	Tg11g14540.t1	Segmental duplication	0.350719	-	-	540	117.583	422.417	-
TgWRKY34	Tg06g16570.t1	TgWRKY70	Tg15g00190.t1	Segmental duplication	0.188403	0.856479	0.219974	549	117.833	431.167	28.5
TgWRKY34	Tg06g16570.t1	TgWRKY71	Tg15g04020.t1	Segmental duplication	0.394288	-	-	564	120.5	443.5	-
TgWRKY54	Tg11g14540.t1	TgWRKY71	Tg15g04020.t1	Segmental duplication	0.181246	0.765126	0.236884	546	116.417	429.583	25.5
TgWRKY38	Tg07g05750.t1	TgWRKY47	Tg09g16070.t1	Segmental duplication	0.165134	0.610141	0.270649	1548	362.25	1185.75	20.3
TgWRKY38	Tg07g05750.t1	TgWRKY73	Tg15g11370.t1	Segmental duplication	0.3827	1.78503	0.214394	1464	339.167	1124.83	59.5
TgWRKY47	Tg09g16070.t1	TgWRKY52	Tg11g11860.t1	Segmental duplication	0.39458	1.53825	0.256512	1503	351.417	1151.58	51.3
TgWRKY47	Tg09g16070.t1	TgWRKY73	Tg15g11370.t1	Segmental duplication	0.405361	1.59257	0.254532	1479	339.5	1139.5	53.1
TgWRKY52	Tg11g11860.t1	TgWRKY73	Tg15g11370.t1	Segmental duplication	0.153041	0.641479	0.238576	1491	343.667	1147.33	21.4
TgWRKY46	Tg09g15360.t1	TgWRKY48	Tg10g05080.t1	Segmental duplication	0.479121	2.07468	0.230938	1215	291.917	923.083	69.1
TgWRKY46	Tg09g15360.t1	TgWRKY53	Tg11g12300.t1	Segmental duplication	0.582947	1.75642	0.331895	1119	262.333	856.667	58.5
TgWRKY46	Tg09g15360.t1	TgWRKY72	Tg15g10390.t1	Segmental duplication	0.627499	1.70132	0.368832	1203	281.333	921.667	56.7
TgWRKY48	Tg10g05080.t1	TgWRKY50	Tg11g03200.t1	Segmental duplication	0.21743	0.778904	0.279148	1485	347.25	1137.75	26
TgWRKY48	Tg10g05080.t1	TgWRKY72	Tg15g10390.t1	Segmental duplication	0.538075	1.89856	0.283412	1425	335.583	1089.42	63.3
TgWRKY50	Tg11g03200.t1	TgWRKY53	Tg11g12300.t1	Segmental duplication	0.659794	2.01715	0.327093	1344	312.083	1031.92	67.2
TgWRKY50	Tg11g03200.t1	TgWRKY72	Tg15g10390.t1	Segmental duplication	0.514971	2.04702	0.251571	1248	292.417	955.583	68.2
TgWRKY53	Tg11g12300.t1	TgWRKY72	Tg15g10390.t1	Segmental duplication	0.276846	0.614594	0.450454	1323	301.75	1021.25	20.5
TgWRKY17	Tg02g19460.t1	TgWRKY80	Tg17g00440.t1	Segmental duplication	0.149894	0.806875	0.185772	1308	296.583	1011.42	26.9
TgWRKY26	Tg05g16000.t1	TgWRKY32	Tg06g05190.t1	Segmental duplication	0.0701797	0.705125	0.0995281	669	146.583	522.417	23.5
TgWRKY25	Tg05g10440.t1	TgWRKY66	Tg14g11760.t1	Segmental duplication	0.0754487	0.67934	0.111062	1026	224.917	801.083	22.6
TgWRKY21	Tg05g01130.t1	TgWRKY75	Tg16g00670.t1	Segmental duplication	0.19468	0.619038	0.314488	504	110.333	393.667	20.6
TgWRKY22	Tg05g03720.t1	TgWRKY76	Tg16g02090.t1	Segmental duplication	0.25336	0.794663	0.318827	864	200.833	663.167	26.5
TgWRKY23	Tg05g04490.t1	TgWRKY77	Tg16g02410.t1	Segmental duplication	0.163903	0.920318	0.178094	951	235	716	30.7
TgWRKY30	Tg06g01530.t1	TgWRKY91	Tg18g13650.t1	Segmental duplication	0.395972	1.51514	0.261344	534	118.75	415.25	50.5
TgWRKY40	Tg07g15160.t1	TgWRKY45	Tg09g11820.t1	Segmental duplication	0.143845	0.721455	0.199382	669	145.667	523.333	24
TgWRKY43	Tg08g13450.t1	TgWRKY58	Tg12g08730.t1	Segmental duplication	0.221856	0.737536	0.300807	1392	301.583	1090.42	24.6
TgWRKY36	Tg07g05610.t1	TgWRKY56	Tg12g07000.t1	Segmental duplication	0.301765	0.918525	0.328532	1056	240.583	815.417	30.6
TgWRKY37	Tg07g05620.t1	TgWRKY57	Tg12g07010.t1	Segmental duplication	0.315893	0.928336	0.340278	798	175.75	622.25	30.9
TgWRKY49	Tg10g10430.t1	TgWRKY79	Tg16g10190.t1	Segmental duplication	0.101203	0.798341	0.126766	921	206.25	714.75	26.6
TgWRKY51	Tg11g11770.t1	TgWRKY74	Tg15g11640.t1	Segmental duplication	0.220439	0.698582	0.315551	939	222.583	716.417	23.2
TgWRKY55	Tg12g00370.t1	TgWRKY98	TgUn326g00070.t1	Segmental duplication	0	0.0044461	0	2016	451.167	1564.83	0.15
TgWRKY63	Tg13g04670.t1	TgWRKY85	Tg17g11320.t1	Segmental duplication	0.28317	1.01837	0.278063	945	205.833	739.167	33.9
TgWRKY2	Tg01g04330.t1	TgWRKY3	Tg01g04340.t1	Tandem duplication	0.135103	0.164513	0.821231	549	129.75	419.25	54.8
TgWRKY4	Tg01g04470.t1	TgWRKY5	Tg01g04480.t1	Tandem duplication	0.140974	0.16376	0.860857	549	131.417	417.583	54.6

## Sheet: Sheet2
0.15	15.3	50.5	82.5
	20.3	51.3	96.1
	20.3	53.1	97.6
	20.5	53.2	107.5
	20.6	54.6	110
	21.4	54.8	119.3
	22.3	56
	22.6	56.7
	23	57
	23.2	58.5
	23.5	59.5
	24	63.3
	24.6	65.4
	25.5	67.2
	25.7	68.2
	25.9	69.1
	26
	26.3
	26.4
	26.5
	26.6
	26.9
	27
	27.1
	27.8
	28.5
	30.3
	30.6
	30.7
	30.7
	30.9
	33.9
-
-
-
-
-
-
-
-
-
-
