# Supplementary figures and images for: Genome-Wide Identification and Expression Profile Analysis of WRKY Family Genes in Teak (Tectona Grandis)
Source: Research Square preprint supplement (doi:10.21203/rs.3.rs-108100/v1), 2020-11-19

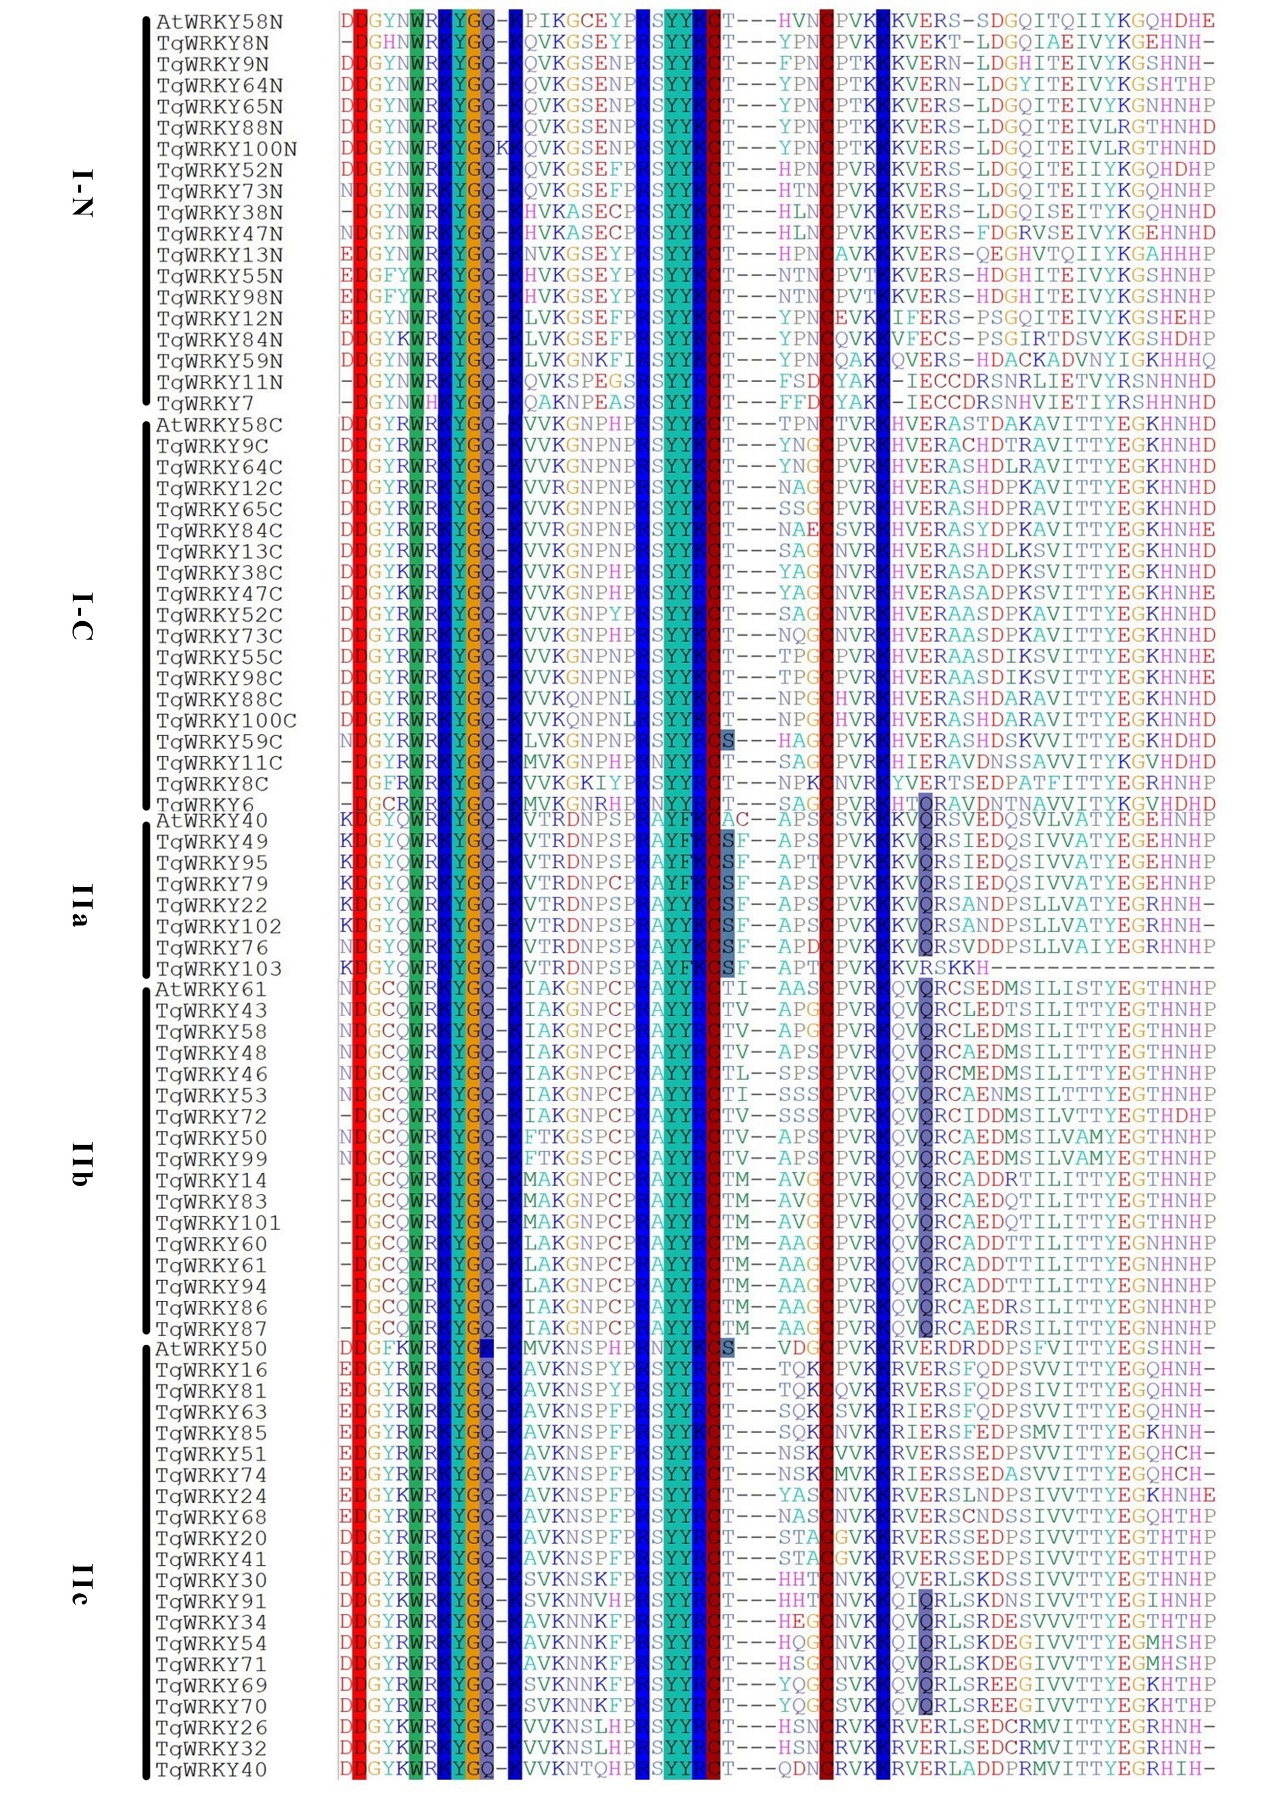

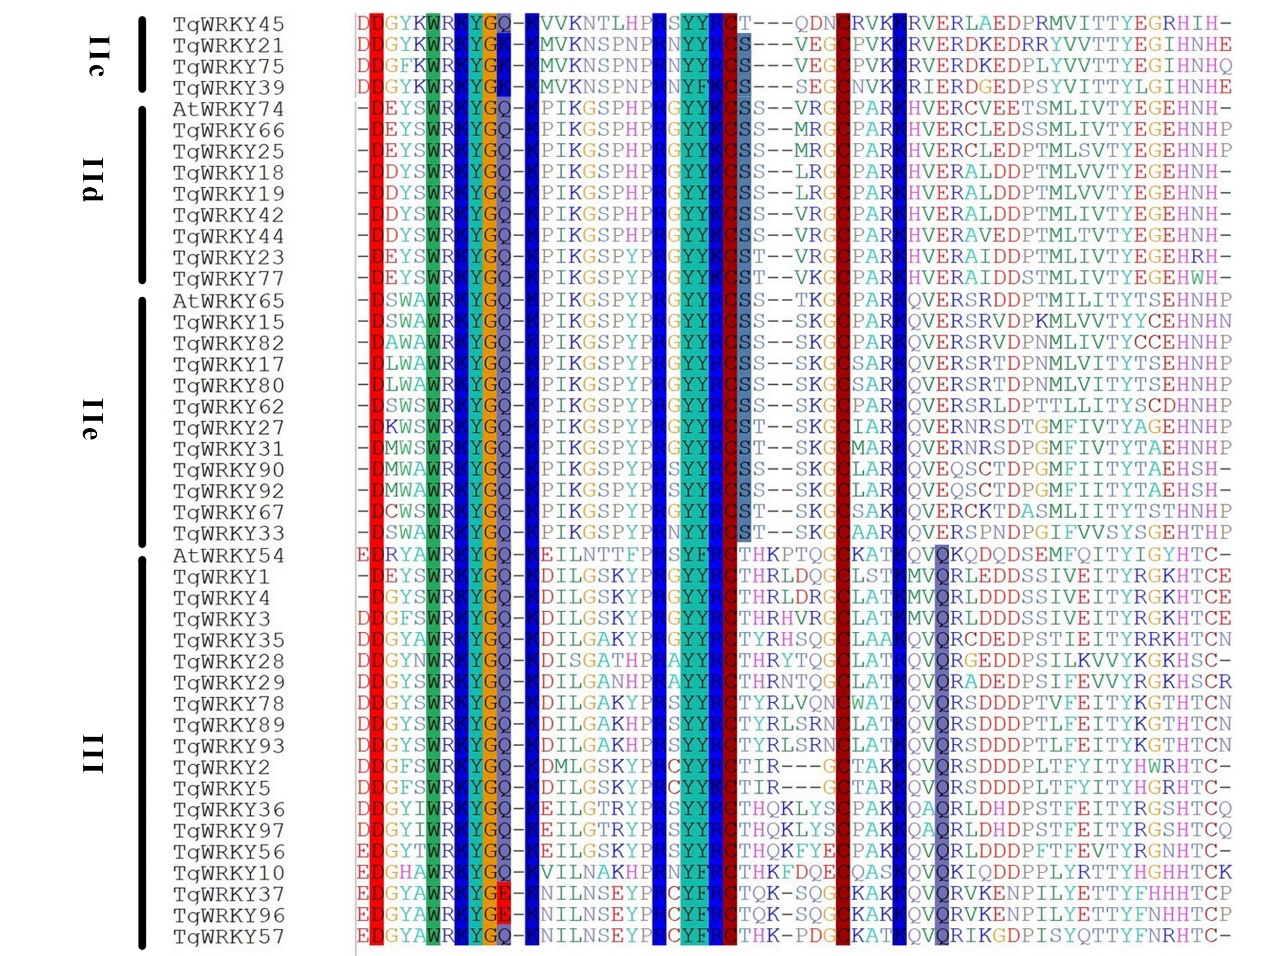


­­­

Supplement: Supplementary file 3 [file fedb81a0d1b91d5017cc08f7.docx]
